# Supplementary material
Source: Springer Nature journal article supplement (https://www.springermedizin.de/resource/supplementary/13019_2006_70_MOESM1_ESM.pdf/9637786)

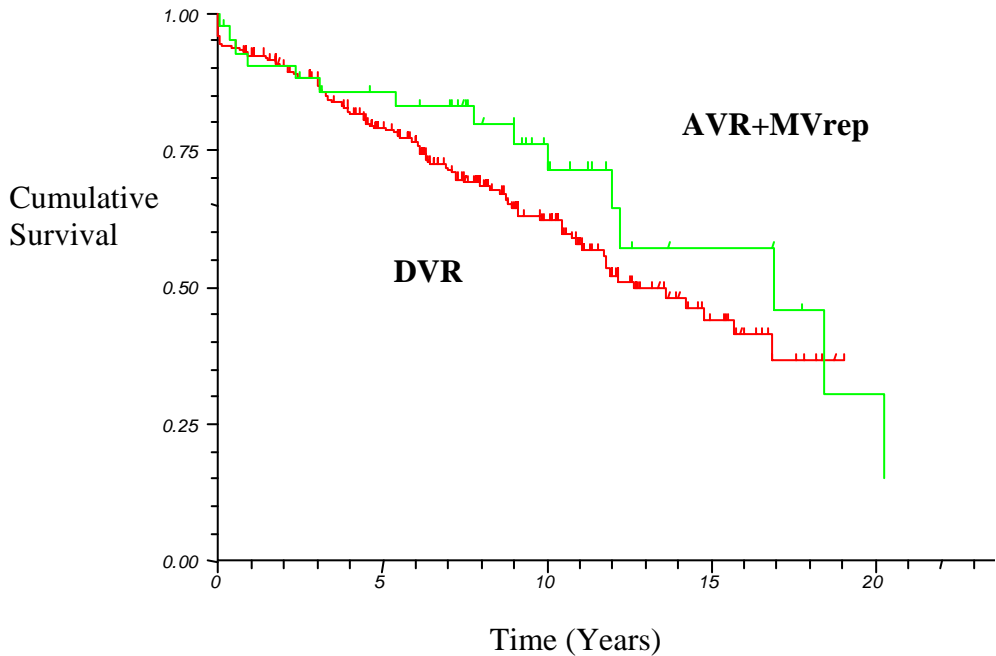

Supplement: MOESM1 [file 9637786]
